# Supplementary material for: MicroRNA-129 Inhibits Glioma Cell Growth by Targeting CDK4, CDK6, and MDM2
Source: PubMed Central journal article supplement — Mol Ther Nucleic Acids. 2019 Dec 12;19:759–64. doi: 10.1016/j.omtn.2019.11.033 (PMC6965505; doi:10.1016/j.omtn.2019.11.033), 2019-12-12
Supplement: mmc1.pdf [file mmc1.pdf]

OMTN, Volume 19

## Supplemental Information

### MicroRNA-129 Inhibits Glioma Cell Growth

#### by Targeting *CDK4*, *CDK6*, and *MDM2*

Atieh Moradimotlagh, Ehsan Arefian, Rezvan Rezazadeh Valojerdi, Shokoofeh Ghaemi, Fatemeh Jamshidi Adegani, and Masoud Soleimani

## Supplementary data

Figure S1. The result of the transduction of A. U251 and B. U87 cells with the Lentiviral particles that express miR-129. Left: Optical image of transduced cells. Right: the fluorescent image of the same cells. The percentage of transduction can be estimated by comparing the two images.

Figure S2. The results of cell cycle assay in U87 cell line after miR-129 overexpression (B) in comparison with cells transduced with scramble control (A).

Table S1. Used primers for hsa-mir-129 gene and 3' UTR cloning.

Table S2. Used primers for cDNA synthesis and Real-time PCR for hsa-miR-129-5p and *SNORD47*.

Table S3. Used primers for Real-time PCR for  *$\beta$ 2m*, *CDK4*, *CDK6* and *MDM2* genes.

Figure S1.

A.

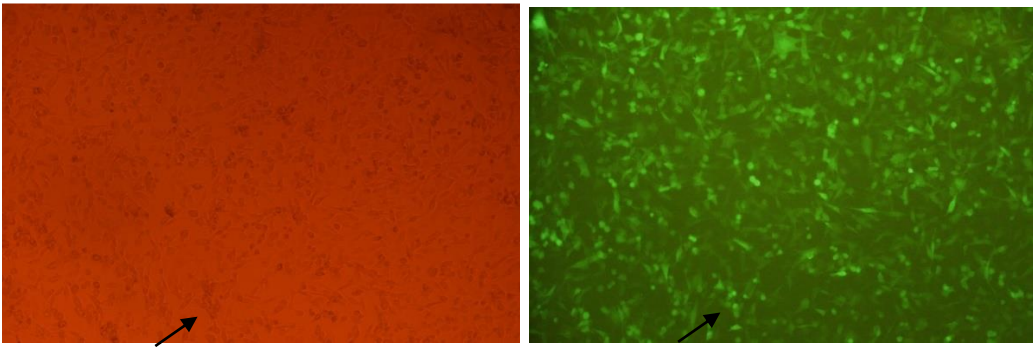

B.

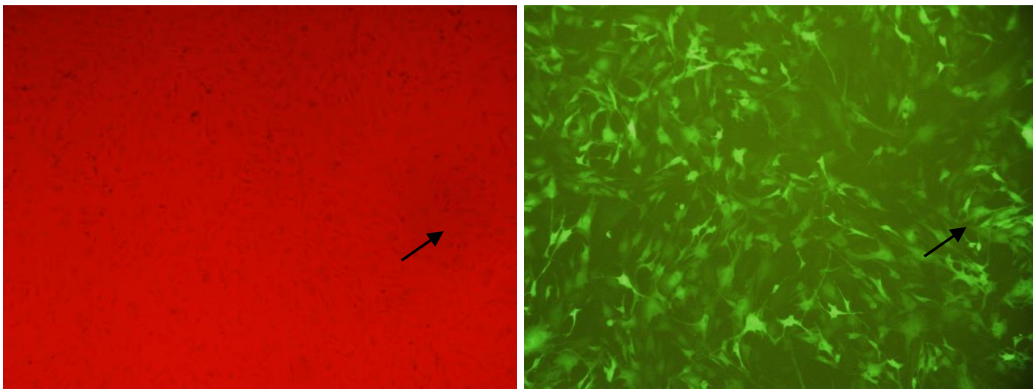

Figure S2.

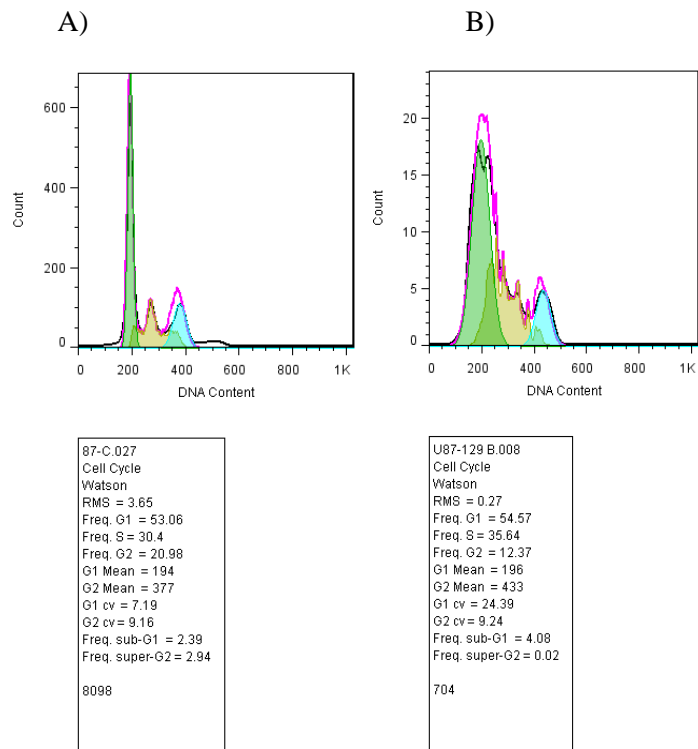

Table S1.

| Cloning Primers |         |                         |
|-----------------|---------|-------------------------|
| mir-129         | Forward | CTCTCAGCTTTCTCTTCTC     |
|                 | Reverse | GTCACTCAGCAACTCTAAAG    |
| <i>CDK4</i>     | Forward | CGGAGTGAGCAATGGAGTG     |
|                 | Reverse | CTAAGGGTAAATCAGGGATAGGG |
| <i>CDK6</i>     | Forward | GCACATCAGTAATTCAGTAGAC  |
|                 | Reverse | ATAGCCAGGAGAGTAATTCATC  |
| <i>MDM2</i>     | Forward | GTCATCCTTTACACCAACTCC   |
|                 | Reverse | TACCTCCCTTATAGACCATTACG |

Table S2.

|                       |                                            |                                                                      |
|-----------------------|--------------------------------------------|----------------------------------------------------------------------|
| hsa-miR-129-5p        | RT primer                                  | CCAGGTATGCAGAGCAGGGTCCGAGGTATCCAT<br>CGCACGCATCGCACTGCATACCTGGGCAAGC |
|                       | Forward primer                             | AGCTTTTTGCGGTCTGG                                                    |
| <i>SNORD47</i>        | RT primer                                  | GTCGTATGCAGAGCAGGGTCCGAGGTATTCGCA<br>CTGCATACGACAACCTC               |
|                       | Forward primer                             | ATCACTGTAAAACCGTTCCA                                                 |
| Common Reverse primer | GAGCAGGGTCCGAGGT                           |                                                                      |
| Universal probe       | FAM 5' TCCATCGCACGCATCGCACT 3' BHQ-1-3'    |                                                                      |
| <i>SNORD47</i> probe  | FAM 5' TGATTCTGAGGTTGTCGTATGCA 3' BHQ-1-3' |                                                                      |

Table S3.

| Real-time PCR primers |         |                                 |
|-----------------------|---------|---------------------------------|
| <i>β2m</i>            | Forward | ATG CCT GCC GTG TGA AC          |
|                       | Reverse | ATC TTC AAA CCT CCA TGA TG      |
| <i>CDK4</i>           | Forward | GCT GCT GGA AAT GCT GAC         |
|                       | Reverse | CAC TCC ATT GCT CAC TCC         |
| <i>CDK6</i>           | Forward | GCG ACT TGA AGA ACG GAG         |
|                       | Reverse | ATC AAA CAA CCT GAC CAC G       |
| <i>MDM2</i>           | Forward | TGT AAC CAC CTC ACA GAT TCC     |
|                       | Reverse | GCA CCA ACA GAC TTT AAT AAC TTC |
