# Supplementary material for: MicroRNA-129 Inhibits Glioma Cell Growth by Targeting CDK4, CDK6, and MDM2
Source: PubMed Central journal article supplement — Mol Ther Nucleic Acids. 2019 Dec 12;19:759–64. doi: 10.1016/j.omtn.2019.11.033 (PMC6965505; doi:10.1016/j.omtn.2019.11.033), 2019-12-12
Supplement: mmc2.pdf [file mmc2.pdf]

# MicroRNA-129 Inhibits Glioma Cell Growth by Targeting *CDK4*, *CDK6*, and *MDM2*

Atieh Moradimotlagh,<sup>1</sup> Ehsan Arefian,<sup>1</sup> Rezvan Rezazadeh Valojerdi,<sup>1</sup> Shokoofeh Ghaemi,<sup>1</sup> Fatemeh Jamshidi Adegani,<sup>2</sup> and Masoud Soleimani<sup>3</sup>

<sup>1</sup>Department of Microbiology, School of Biology, College of Science, University of Tehran, Tehran, Iran; <sup>2</sup>Laboratory for Stem Cell & Regenerative Medicine, Natural and Medicinal Sciences Research Center, University of Nizwa, PO Box 33, PC 616, Nizwa, Oman; <sup>3</sup>Department of Hematology, School of Medical Science, Tarbiat Modares University, Tehran, Iran

**Glioblastoma is the most common malignant primary brain tumor among adults and one of the most lethal cancers. It is characterized by the deregulation of signaling pathways involving proliferation, growth, survival, and other factors. MicroRNAs (miRNAs) play a role in the regulation of genes by affecting the 3' untranslated region (UTR) of mRNA and affect many cell functions. The present study showed that miR-129 decreased the expression of retinoblastoma and p53 signaling pathways' genes, including *CDK4*, *CDK6*, and *MDM2*. The real-time PCR data indicated that expression of *CDK4* in U251 and U87 cell lines declined by 69.8% and 47% ( $p < 0.05$ ), respectively, and expression of *CDK6* and *MDM2* in U251 cells decreased by 55.3% ( $p < 0.0001$ ) and 34.7% ( $p < 0.05$ ), respectively. Luciferase assays confirmed that overexpression of miR-129 decreased the expression of the *CDK4* gene by 58.9% ( $p < 0.01$ ), *CDK6* by 35.7% ( $p < 0.0001$ ), and *MDM2* by 49% ( $p < 0.001$ ). Moreover, cell cycle assays showed a decrease of the G<sub>2</sub>-phase population to 10% and pre-G<sub>2</sub> arrest in U87 cells ( $p < 0.05$ ). Additionally, wound healing assays indicated that miR-129 overexpression inhibits cell growth of glioblastoma cells. These findings introduced novel targets for miR-129 in glioblastoma cells.**

## INTRODUCTION

Grade IV astrocytoma or glioblastoma multiforme (GBM) is a kind of tumor that stems from glial (supportive cells) tissue of the brain and spinal cord in the CNS (central nervous system) and contains cells that grow fast and look very different in comparison with normal cells. This cancer is more common in adults than children and affects the brain more often than the spinal cord.<sup>1</sup> The median survival for GBM patients is less than 15–20 months.<sup>2</sup> The incidence of GBM in European and US populations is less than 2 and about 3 per 100,000, respectively, per year, and it tends to be higher in more developed countries. It is 1.5-fold more common in men.<sup>3</sup>

Numerous factors contribute to a tragic outcome for GBM patients.

(1) Surgery and radiation therapy have limitations because of the proximity of critical functional structures in the brain. (2) The tumor margin is hardly defined, since cancerous cells tend to be highly invasive, and they migrate into the brain parenchyma and through blood

vessels and white matter tracks. Therefore, recurrence typically occurs within a few centimeters. (3) The existence of cancer stem cells (CSCs) that are tumor initiating and propagating, and in some cases radiotherapy and chemotherapy resistant, provides the chance of recurrence. (4) Targeting specific oncogenic pathways because of heterogeneous genotype, histology, and pathology is complex. (5) The blood-brain barrier (BBB) limits therapeutic delivery. (6) The immune-privileged status of the brain and immune-suppressive features of the tumor limit systemic immune responses. As a result, there is an essential need for new therapeutic strategies that can overcome these barriers to treatment, and gene therapy may hold promise for the treatment of GBM.<sup>4</sup> The most common strategies to treat GBM via gene therapy include suicide gene therapy, immune response activation, oncolytic viruses, and reprogramming.<sup>5</sup>

Advances in the understanding of signaling pathways that underlie glioblastoma pathogenesis have resulted in the development of new therapeutic approaches targeting multiple oncogenic signaling aberrations associated with GBM. The signaling pathways that are physiologically and pathologically relevant to GBM consist of p53, retinoblastoma (RB), phosphatidylinositol 3-kinase (PI3K)/phosphatase and tensin homolog (PTEN)/Akt/mammalian target of rapamycin (mTOR), RAS/mitogen-activated protein kinase (MAPK), and signal transducer and activator of transcription 3 (STAT3)/ZIP4.<sup>6</sup> Based on The Cancer Genome Atlas (TCGA) research, the RB signaling pathway was altered in 78% of glioblastoma samples, consisting of 52% mutation or homozygous deletion of *CDKN2A* (P16/INK4A), 47% homozygous deletion of *CDKN2B*, 2% homozygous deletion of *CDKN2C*, and amplification of *CDK4* and *CDK6* to 18% and 1%, respectively.<sup>7,8</sup> The tumor suppressor RB (pRB) has a crucial role in inhibiting cell cycle progression by binding and inhibiting E2F family transcription factors. In brief, in the G<sub>1</sub> phase, pRB is normally inactivated by Cyclin D/CDK4/CDK6-induced phosphorylation, which leads to the release of pRB from E2F and the subsequent stimulation of cell progression into the S phase.

Received 17 July 2019; accepted 8 November 2019;  
<https://doi.org/10.1016/j.omtn.2019.11.033>.

**Correspondence:** Ehsan Arefian, Department of Microbiology, School of Biology, College of Science, University of Tehran, Tehran, Iran.

**E-mail:** [arefian@ut.ac.ir](mailto:arefian@ut.ac.ir)

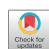



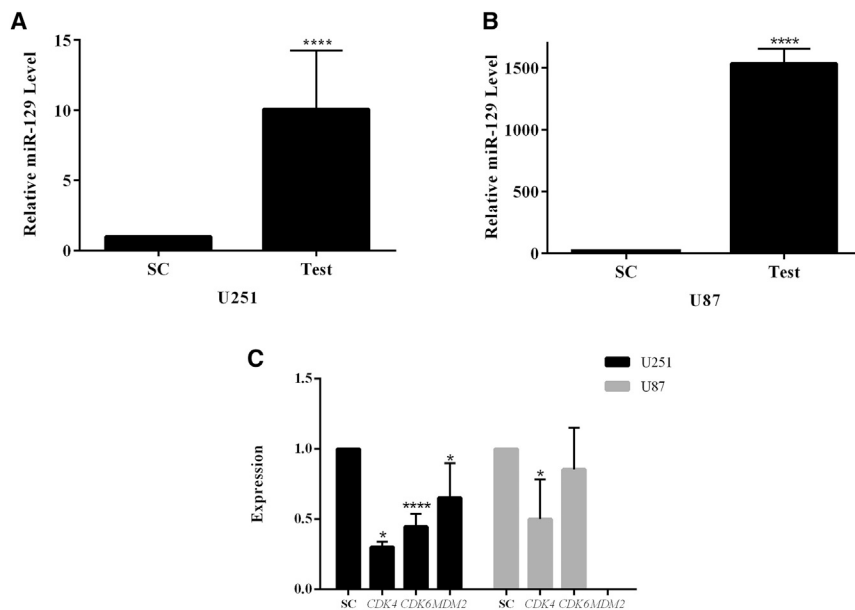

**Figure 1. Upregulation of miR-129 in GBM Cells Can Affect Genes' Expression**

(A and B) Upregulation of miR-129 in (A) U251 and (B) U87 cells compared with the control group. (C) Downregulation of *CDK4*, *CDK6*, and *MDM2* in transduced cells with LV-miR-129 compared with the control group. \* $p < 0.05$ , \*\*\*\* $p < 0.0001$ . SC, scrambled control.

### Overexpression of miR-129 Inhibits Cell Cycle and Growth in Glioblastoma Cells

To investigate whether miR-129 affects glioblastoma cell growth via regulation of *CDK4*, *MDM2*, and *CDK6*, we performed a cell cycle analysis. First, we transduced the glioblastoma cells with LV-miR-129 and then analyzed the cell cycle by the flow cytometry method. We found that miR-129 arrests U87 cells in pre- $G_2$  phase, and the population of cells in the  $G_2$  phase decreased significantly to 10% ( $p < 0.05$ ) (Figure 3; Figure S2). Cell cycle analysis of

U251 cells showed no significant changes after miR-129 overexpression.

The wound healing assay results demonstrated that miR-129-5p-transduced cells had a significantly lower wound closure rate than that of the control group (Figure 4). Inhibition of the U87 cell line was so strong that we could not expand U87-transduced cells for this assay, although we cultured them for more than 2 weeks. These results suggested that overexpression of miR-129 correlated with inhibition of cell cycle progression in glioblastoma cells, and that miR-129 may serve as a tumor suppressor in glioma.

### Induction of miR-129 Expression in Glioblastoma Cells

Lentiviral particles that contain miR-129 (LV-miR-129) were used for transduction of glioblastoma cell lines U251 (Figure S1A) and U87 (Figure S1B). Consequently, the expression level of miR-129 in U251 and U87 cell lines was quantified via real-time PCR. The results show that the miR-129 expression increased to 10.08- and 1,533.99-fold ( $p < 0.0001$ ) in U251 and U87 cells, respectively, in comparison with the control group (Figures 1A and 1B).

### Expression of *CDK4*, *CDK6*, and *MDM2* in Glioblastoma Cell Lines

Following the proof of significant overexpression of miR-129 in transduced cell lines, the expressions of *CDK4*, *CDK6*, and *MDM2* genes were analyzed by real-time PCR. We analyzed the total mRNA of these cells and determined that expression of *CDK4* in U251 and U87 cell lines declined by 69.8% and 47% ( $p < 0.05$ ), respectively, and expression of *CDK6* and *MDM2* in U251 cells decreased by 55.3% ( $p < 0.0001$ ) and 34.7% ( $p < 0.05$ ), respectively (Figure 1C). Our bioinformatics studies suggested that miR-129 targets these genes and may proceed to inhibit cell signaling. Hence, the real-time PCR data suggested that the prediction could be trustworthy.

### miR-129 Targets *CDK4*, *CDK6*, and *MDM2* Dramatically

A luciferase reporter assay was taken into account to prove the significant interaction between miR-129 and the predicted binding site in the 3' UTR of the understudied genes. The results indicated that overexpression of miR-129 can decrease the expression of the *CDK4* gene by 58.9% ( $p < 0.01$ ) and reduce the *CDK6* expression by 35.7% ( $p < 0.0001$ ) in HEK293 cells. The *MDM2* expression was reduced by 49% ( $p < 0.001$ ) as well (Figure 2). As a result, we can claim that miR-129 significantly targets and inhibits *CDK4*, *CDK6*, and *MDM2* expression significantly.

### DISCUSSION

Glioblastoma is one of the most lethal forms of human cancer. Despite improvements in understanding GBM molecular mechanisms, certain treatments are not available and require further studies. Previously, it was shown that miR-129 is downregulated in human glioma cancer.<sup>18</sup> miRNAs play roles in almost all biological pathways, such as cell proliferation, apoptosis, and tumorigenesis. Dysregulation of miRNAs can lead to different kinds of diseases, such as cancer. They have the potential of being tumorigenic or tumor suppressive at the beginning of cancer and affect its progression, metastasis, and response to treatment.<sup>19</sup>

Previously, it was shown that extrinsic miR-129 expression functions as a tumor suppressor in colon<sup>20</sup> and papillary thyroid cancer.<sup>21</sup> Additionally, some targets and functions have been recognized for miR-129 through its induced overexpression in glioma cell lines. In brief, in 2017 it was shown that miR-129-5p could target *FNDC3B* by binding to the 3' UTR. The overexpression of miR-129-5p and the inhibition of *FNDC3B* can both inhibit U87 cell viability, proliferation, migration, and invasion while promoting cell apoptosis.<sup>22</sup> Xiong et al.<sup>23</sup> indicated that miR-129 inhibits the expression of *SOX2* and suppresses glioma

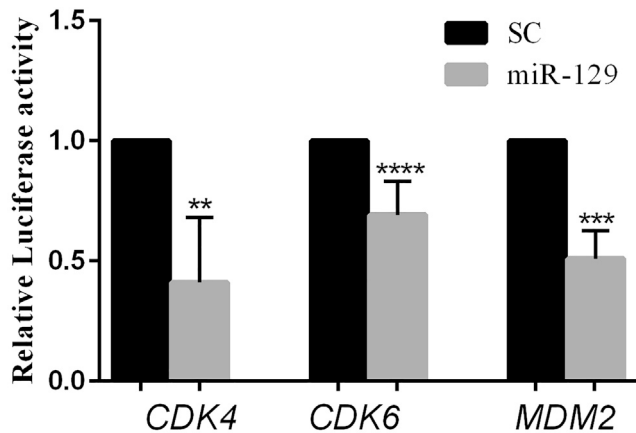

**Figure 2. *CDK4*, *CDK6*, and *MDM2* Are Targeted by miR-129**

Analysis of luciferase assay in HEK293 cells co-transfected with miR-129 and *CDK4*-3' UTR or *CDK6*-3' UTR, or *MDM2*-3' UTR in comparison with control groups that are HEK293 cells co-transfected with scramble control and 3' UTR vectors. \*\* $p < 0.01$ , \*\*\* $p < 0.001$ , \*\*\*\* $p < 0.0001$ . SC, scrambled control.  $n = 3$ .

stem cell proliferation. Alternatively, MALAT1 as a long non-coding RNA (lncRNA) promotes the expression of *SOX2* and boosts the viability and proliferation of glioma stem cells. The effects of MALAT1 and miR-129 on the glioma tumor in a xenograft mouse model indicated that MALAT1 promotes glioma tumor growth by regulating miR-129 and *SOX2*. In another study, it has been shown that miR-129-2 is downregulated in human glioma cancer, partially due to its DNA promoter hypermethylation. Overexpression of miR-129-2 suppressed cell growth, migration, and invasion and promoted cell apoptosis in U373 and U87 glioma cell lines through targeting the oncogene *HMGB1* (high-mobility group box 1), which has been found to be upregulated and involved in the pathogenesis of many kinds of human

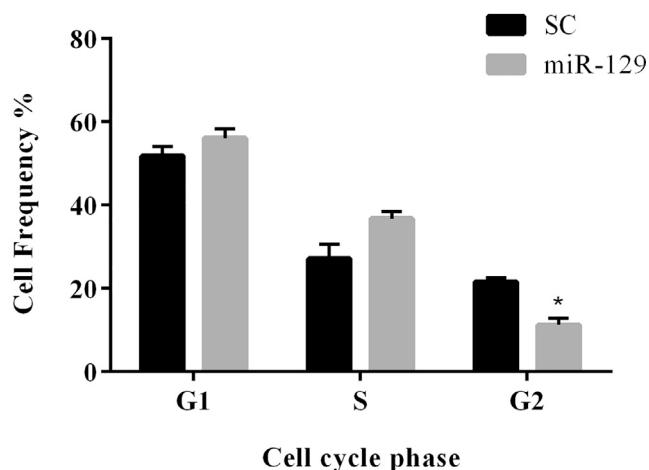

**Figure 3. Flow Cytometry Analysis of Cell Cycle**

The pre-G<sub>2</sub> arrest of U87 cell line after overexpression of miR-129 compared with U87 cells transduced with scramble control. \* $p < 0.05$ . SC, scrambled control.  $n = 3$ .

cancers, and inhibiting its expression in glioma cells.<sup>18</sup> Moreover, it has been shown that miR-129 is a new inducer of autophagy both through mTOR signaling and upregulation of *Beclin-1* by targetedly suppressing Notch-1 in U251 and U87 cells. In fact, miR-129-5p triggered autophagy partially by the Notch-1/*E2F7*/*Beclin-1* axis.<sup>24</sup>

In our study, two cell lines were used to compare the results in different mutation patterns and to confirm the reproducibility of our tests. Both U251 and U87 cell lines are mutant in the *PTEN* gene and have a methylated *MGMT* promoter, while the *p53* gene is mutant in the U251 cell line as well.<sup>25</sup> The present study indicated that induced expression of miR-129 negatively correlated with expression of *CKD4*, *CDK6*, and *MDM2* in real-time PCR. To confirm the significant correlation between miR-129 and genes, a luciferase assay was used. Analysis of assays demonstrated that miR-129 dramatically targets the 3' UTR of *CDK4*, *CDK6*, and *MDM2*. Targeted genes have function in RB and p53 signaling pathways and are upregulated in glioma. Therefore, their suppression via miR-129 can potentially inhibit cell signaling and promote cell cycle arrest. As we expected, cell cycle analysis verified pre-G<sub>2</sub> arrest, and wound healing assays showed significant proliferation inhibition in comparison with the control group.

## CONCLUSION

In summary, the findings of the present study identified *CDK4*, *CDK6*, and *MDM2* as new targets of miR-129 in glioma cells, and these new findings can be of help in future clinical and GBM signaling-based research.

## MATERIALS AND METHODS

### Bioinformatics Analysis

The KEGG database was used to investigate signaling pathways, and upregulated genes were identified via published documents based on TCGA project. Additionally, the high-throughput data from the Expression Atlas database was used to assess the expression of genes in glioma cell lines. To select miRNAs that target desirable upregulated genes, we used the following bioinformatics databases: TargetScan with a context++ score lower than  $-0.01$ , RNA22 with maximum folding energy for a heteroduplex of  $-10$  kcal/mol, and the miRanda algorithm with a mirSVR score lower than  $-0.001$  thresholds.

### Cell Lines and Culture

Studied cell lines consisted of U87MG (IBRC C10982) and HEK293 cells (IBRC C10139), which were purchased from the Iranian Biological Resource Center (IBRC, Tehran, Iran). U251 was gifted from the Stem Cell Technology Research Center (Tehran, Iran), and short tandem repeat (STR) DNA profiling analysis verified cell authentication. All of the cell lines were cultured in high-glucose DMEM (4.5 g/L) (Bio Idea, Tehran, Iran) supplemented with 10% fetal bovine serum (FBS) (Gibco) and antibiotics (100 U/mL penicillin, 100 mg/mL streptomycin) in a 5% CO<sub>2</sub> incubator at 37°C. All cells were passaged at 2- or 3-day intervals.

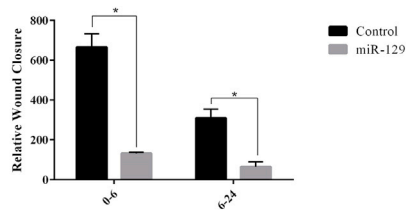

**Figure 4. U251 Transduced Cells by LV-miR-129 Demonstrated a Lower Wound Closure Rate Than Did the Control Group**

\* $p < 0.05$ .  $n = 3$ .

| Time Point / Cell type | 0 hour | 6 hours | 24 hours |
|------------------------|--------|---------|----------|
| U251-NC                |        |         |          |
| U251-129               |        |         |          |

### Cloning of Genes and miRNA

The mir-129 gene was amplified by PCR using Taq DNA polymerase (cinnaGen) and specific primers (Table S1). Then, it was cloned into a pCDH-CMV-MCS-EF1-cGFP-T2A-puro vector (System Biosciences, USA). The full-length 3' UTR of the *CDK4* gene (1,060th nt to the end of mRNA NM\_000075.4) and partial lengths of *CDK6* 3' UTR (6,998–11,580 nt of transcript variant 1 mRNA NM\_001259.8) and *MDM2* 3' UTR (1,593–6,048 nt of transcript variant 3 mRNA NM\_001145337.3) were amplified by PCR on genomic DNA using Takara SpeedSTAR HS DNA polymerase (catalog no. RR070A/B) and specific primers (Table S1). PCR fragments were cloned into the psiCHECK-2 Dual-Luciferase reporter plasmid separately (Promega, Madison, WI, USA) downstream of the Renilla luciferase gene. The pLenti-III-eGFP scramble vector was used as a negative control for miRNA.

### RNA Isolation and Quantitative Real-Time RT-PCR

Total RNA was extracted from transduced glioma cell lines after 72 h using a GeneAll Hybrid-R kit (catalog no. 305-101), according to the manufacturer's instructions. The quality and concentration of total RNA were examined using spectrophotometry. Extracted total RNA was converted to cDNA by using Moloney murine leukemia virus (M-MLV) reverse transcription (RT) enzyme (Thermo Fisher, catalog no. 28025013) and a specific RT primer for miR-129 and random hexamer for *CDK4*, *CDK6*, and *MDM2* expression.

For qPCR, miR-129 expression was quantitated by using specific primers and a TaqMan probe relative to *SNORD47* as an endogenous control. The *CDK4*, *CDK6*, and *MDM2* genes' expressions were calculated relative to the  $\beta 2M$  gene using SYBR Green. The primers in this study used for cDNA synthesis and real-time PCR are as shown

in Tables S2 and S3. Relative expression was determined using the  $2^{-\Delta\Delta Ct}$  method.

### Virus Production

Recombinant lentiviruses were produced by transfection of one T25 flask of HEK293 cells at 60%–80% confluency with 2  $\mu$ g of lentiviral vector (carrying hsa-miR-129), 2  $\mu$ g of psPAX2 (gag/pol), and 1  $\mu$ g of pMD2.G (VSVg) using the QIAGEN PolyFect transfection reagent (QIAGEN, Hilden, Germany, catalog no. 301107). psPAX2 and pMD2.G virus packaging helper vectors were purchased from the Stem Cell Technology Research Center (Tehran, Iran). Virus supernatant was collected in the 3

following days. For *in vitro* assays, glioblastoma cell lines were cultured in a T25 flask at 60%–80% confluency and were transduced by using hexadimethrine bromide (also known as Polybrene) as a transduction enhancer.

### Luciferase Reporter Assay

In brief, for the luciferase reporter assay, miR-129 or scramble vector was transfected into cells, along with *CDK4*-3' UTR, *CDK6*-3' UTR, or *MDM2*-3' UTR, using Lipofectamine 2000 transfection reagent (Invitrogen), according to the manufacturer's protocol. Luciferase activity was evaluated 48 h after transfection using a Dual-Luciferase reporter assay system (Promega), according to the manufacturer's instructions. Firefly luciferase activity was used for normalization.

### Flow Cytometry Analysis

Cell cycle was evaluated 72 h after transduction. Transduced cells were trypsinized and washed in ice-cold PBS. Afterward, cells were fixed with cold paraformaldehyde for 1 h at 4°C. Then, we permeabilized cells by adding 70% ethanol at  $-20^{\circ}\text{C}$  drop-wise to the cell pellet with the tube sitting on the vortex mixer and incubated the cell suspension overnight at  $-20^{\circ}\text{C}$ . Subsequently, we stained cells with propidium iodide (PI) working solution, which consisted of PI, PBS, Triton X-100, and RNase A, and incubated them at 37°C in the dark for 30 min. Then, we analyzed the samples on a BD FACSCalibur flow cytometer (BD Biosciences, San Jose, CA, USA).

### Statistical Analysis

The data in this study are presented as mean  $\pm$  SD. Data were compared using Student's t test with GraphPad Prism 6.0 software. Real-time data were statistically analyzed by REST 2009 software, which is under QIAGEN supervision. Differences at  $p \leq 0.05$  were considered significant.

### Wound-Healing Assay

Cell migration was analyzed using a wound-healing assay. Briefly, miR-129 or non-transduced cells were cultured to 80% confluency in 24-well plates. Then, an artificial wound was made, after which the cells were further incubated (0 h). Migration to the scratched area was imaged at 6 and 24 h after wounding. The wound closure was measured by ImageJ software relative to the total area of wounding.

### SUPPLEMENTAL INFORMATION

Supplemental Information can be found online at <https://doi.org/10.1016/j.omtn.2019.11.033>.

### AUTHOR CONTRIBUTIONS

The study was conceptualized by E.A.; The methodology was given by E.A. and M.S.; A.M. carried out the experiments and analyzed the data. R.R.V. and S.G. contributed to designing microRNA and luciferase vectors constructs and assisted with gene cloning. F.J.A. assisted with lentiviral vector packaging and manipulation. The manuscript is written by A.M. and edited by E.A.

### ACKNOWLEDGMENTS

The authors would like to thank the National Institute for Medical Research Development (NIMAD) for the financial support of this research (grant 942974).

### REFERENCES

- National Cancer Institute (2011). What You Need To Know About Brain Tumors. [https://abc2.org/sites/default/files/NCI%20What%20You%20Need%20To%20Know%20About%20Brain%20Tumors\\_0.pdf](https://abc2.org/sites/default/files/NCI%20What%20You%20Need%20To%20Know%20About%20Brain%20Tumors_0.pdf).
- Grossman, S.A., Ye, X., Piantadosi, S., Desideri, S., Nabors, L.B., Rosenfeld, M., and Fisher, J.; NABTT CNS Consortium (2010). Survival of patients with newly diagnosed glioblastoma treated with radiation and temozolomide in research studies in the United States. *Clin. Cancer Res.* *16*, 2443–2449.
- Brandes, A.A., Tosoni, A., Franceschi, E., Reni, M., Gatta, G., and Vecht, C. (2008). Glioblastoma in adults. *Crit. Rev. Oncol. Hematol.* *67*, 139–152.
- Murphy, A.M., and Rabkin, S.D. (2013). Current status of gene therapy for brain tumors. *Transl. Res.* *161*, 339–354.
- Kwiatkowska, A., Nandhu, M.S., Behera, P., Chiocca, E.A., and Viapiano, M.S. (2013). Strategies in gene therapy for glioblastoma. *Cancers (Basel)* *5*, 1271–1305.
- Mao, H., Lebrun, D.G., Yang, J., Zhu, V.F., and Li, M. (2012). Deregulated signaling pathways in glioblastoma multiforme: molecular mechanisms and therapeutic targets. *Cancer Invest.* *30*, 48–56.
- Ahir, B.K., Ozer, H., Engelhard, H.H., and Lakka, S.S. (2017). MicroRNAs in glioblastoma pathogenesis and therapy: A comprehensive review. *Crit. Rev. Oncol. Hematol.* *120*, 22–33.
- Dunn, G.P., Rinne, M.L., Wykosky, J., Genovese, G., Quayle, S.N., Dunn, I.F., Agarwalla, P.K., Chheda, M.G., Campos, B., Wang, A., et al. (2012). Emerging insights into the molecular and cellular basis of glioblastoma. *Genes Dev.* *26*, 756–784.
- Lam, P.Y., Di Tomaso, E., Ng, H.K., Pang, J.C., Roussel, M.F., and Hjelm, N.M. (2000). Expression of p19INK4d, CDK4, CDK6 in glioblastoma multiforme. *Br. J. Neurosurg.* *14*, 28–32.
- Brennan, C.W., Verhaak, R.G., McKenna, A., Campos, B., Nounshmehr, H., Salama, S.R., Zheng, S., Chakravarty, D., Sanborn, J.Z., Berman, S.H., et al.; TCGA Research Network (2013). The somatic genomic landscape of glioblastoma. *Cell* *155*, 462–477.
- Cancer Genome Atlas Research Network (2008). Comprehensive genomic characterization defines human glioblastoma genes and core pathways. *Nature* *455*, 1061–1068.
- Itahana, K., Mao, H., Jin, A., Itahana, Y., Clegg, H.V., Lindström, M.S., Bhat, K.P., Godfrey, V.L., Evan, G.I., and Zhang, Y. (2007). Targeted inactivation of Mdm2 RING finger E3 ubiquitin ligase activity in the mouse reveals mechanistic insights into p53 regulation. *Cancer Cell* *12*, 355–366.
- Reifenberger, G., Ichimura, K., Reifenberger, J., Elkhouloun, A.G., Meltzer, P.S., and Collins, V.P. (1996). Refined mapping of 12q13–q15 amplicons in human malignant gliomas suggests *CDK4/SAS* and *MDM2* as independent amplification targets. *Cancer* *56*, 5141–5145.
- Kim, V.N., Han, J., and Siomi, M.C. (2009). Biogenesis of small RNAs in animals. *Nat. Rev. Mol. Cell Biol.* *10*, 126–139.
- Jiang, Q., Wang, Y., Hao, Y., Juan, L., Teng, M., Zhang, X., Li, M., Wang, G., and Liu, Y. (2009). miR2Disease: a manually curated database for microRNA deregulation in human disease. *Nucleic Acids Res.* *37*, D98–D104.
- Johnson, C.D., Esquela-Kerscher, A., Stefani, G., Byrom, M., Kelnar, K., Ovcharenko, D., Wilson, M., Wang, X., Shelton, J., Shingara, J., et al. (2007). The *let-7* microRNA represses cell proliferation pathways in human cells. *Cancer Res.* *67*, 7713–7722.
- Gramantieri, L., Ferracin, M., Fornari, F., Veronese, A., Sabbioni, S., Liu, C.G., Calin, G.A., Giovannini, C., Ferrazzi, E., Grazi, G.L., et al. (2007). Cyclin G1 is a target of miR-122a, a microRNA frequently down-regulated in human hepatocellular carcinoma. *Cancer Res.* *67*, 6092–6099.
- Yang, Y., Huang, J.Q., Zhang, X., and Shen, L.F. (2015). miR-129-2 functions as a tumor suppressor in glioma cells by targeting HMGB1 and is down-regulated by DNA methylation. *Mol. Cell. Biochem.* *404*, 229–239.
- Romano, G., Veneziano, D., Acunzo, M., and Croce, C.M. (2017). Small non-coding RNA and cancer. *Carcinogenesis* *38*, 485–491.
- Wu, Q., Meng, W.Y., Jie, Y., and Zhao, H. (2018). lncRNA MALAT1 induces colon cancer development by regulating miR-129-5p/HMGB1 axis. *J. Cell. Physiol.* *233*, 6750–6757.
- Zhang, H., Cai, Y., Zheng, L., Zhang, Z., Lin, X., and Jiang, N. (2018). Long noncoding RNA NEAT1 regulate papillary thyroid cancer progression by modulating miR-129-5p/*KLK7* expression. *J. Cell. Physiol.* *233*, 6638–6648.
- Xu, H., Hu, Y., and Qiu, W. (2017). Potential mechanisms of microRNA-129-5p in inhibiting cell processes including viability, proliferation, migration and invasiveness of glioblastoma cells U87 through targeting FNDC3B. *Biomed. Pharmacother.* *87*, 405–411.
- Xiong, Z., Wang, L., Wang, Q., and Yuan, Y. (2018). lncRNA MALAT1/miR-129 axis promotes glioma tumorigenesis by targeting SOX2. *J. Cell. Mol. Med.* *22*, 3929–3940.
- Chen, X., Zhang, Y., Shi, Y., Lian, H., Tu, H., Han, S., Yin, J., Peng, B., Zhou, B., He, X., and Liu, W. (2016). miR-129 triggers autophagic flux by regulating a novel Notch-1/E2F7/Beclin-1 axis to impair the viability of human malignant glioma cells. *Oncotarget* *7*, 9222–9235.
- Sesen, J., Dahan, P., Scotland, S.J., Saland, E., Dang, V.T., Lemarié, A., Tyler, B.M., Brem, H., Toulas, C., Cohen-Jonathan Moyal, E., et al. (2015). Metformin inhibits growth of human glioblastoma cells and enhances therapeutic response. *PLoS ONE* *10*, e0123721.

OMTN, Volume 19

## Supplemental Information

### MicroRNA-129 Inhibits Glioma Cell Growth

#### by Targeting *CDK4*, *CDK6*, and *MDM2*

Atieh Moradimotlagh, Ehsan Arefian, Rezvan Rezazadeh Valojerdi, Shokoofeh Ghaemi, Fatemeh Jamshidi Adegani, and Masoud Soleimani

## Supplementary data

Figure S1. The result of the transduction of A. U251 and B. U87 cells with the Lentiviral particles that express miR-129. Left: Optical image of transduced cells. Right: the fluorescent image of the same cells. The percentage of transduction can be estimated by comparing the two images.

Figure S2. The results of cell cycle assay in U87 cell line after miR-129 overexpression (B) in comparison with cells transduced with scramble control (A).

Table S1. Used primers for hsa-mir-129 gene and 3' UTR cloning.

Table S2. Used primers for cDNA synthesis and Real-time PCR for hsa-miR-129-5p and *SNORD47*.

Table S3. Used primers for Real-time PCR for  *$\beta$ 2m*, *CDK4*, *CDK6* and *MDM2* genes.



Figure S1.

A.

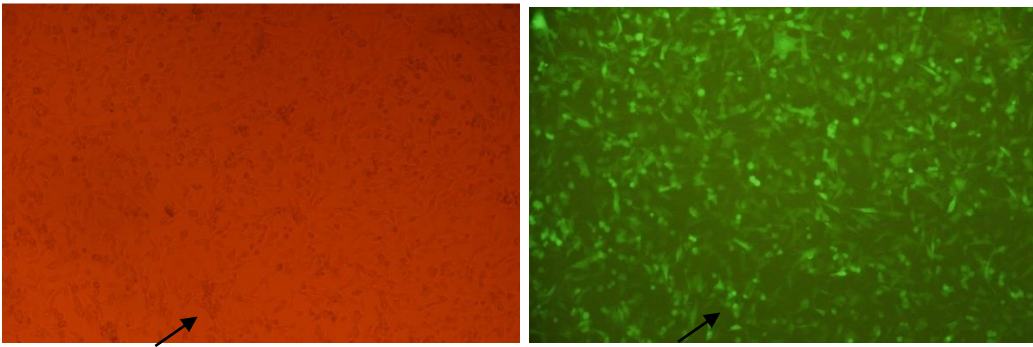

B.

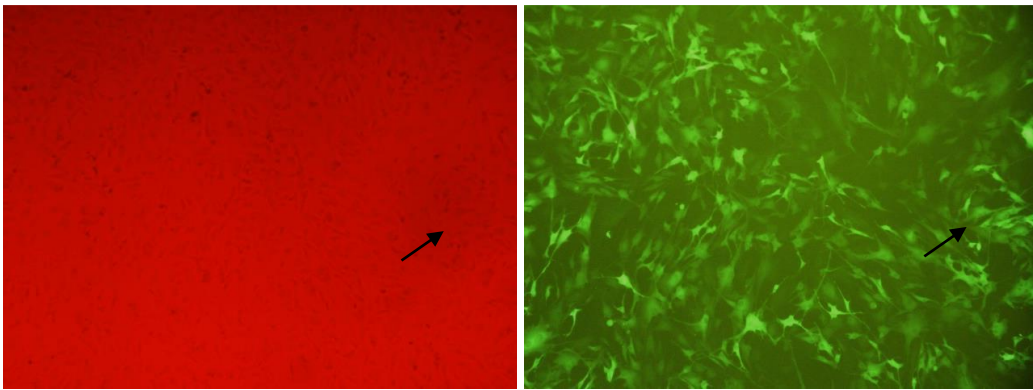

Figure S2.

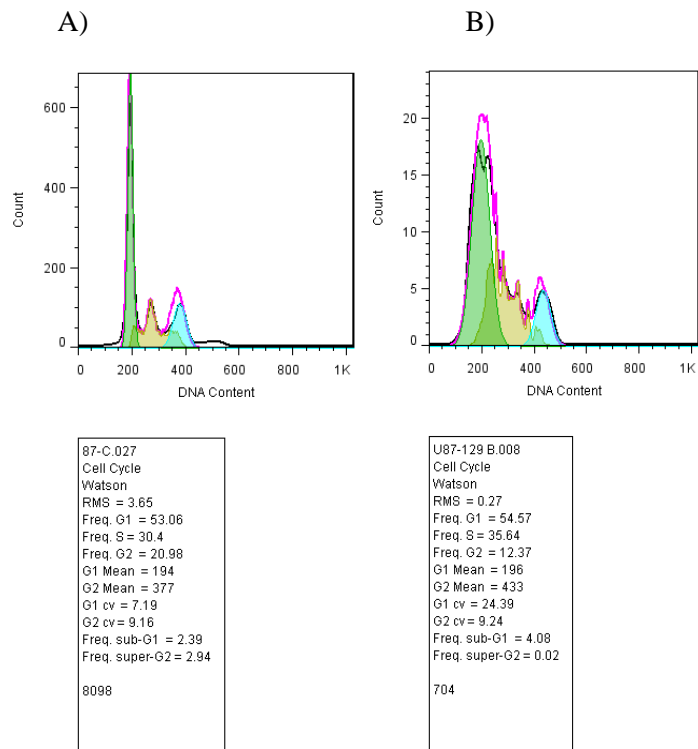

Table S1.

| Cloning Primers |         |                         |
|-----------------|---------|-------------------------|
| mir-129         | Forward | CTCTCAGCTTTCTCTTCTC     |
|                 | Reverse | GTCACTCAGCAACTCTAAAG    |
| <i>CDK4</i>     | Forward | CGGAGTGAGCAATGGAGTG     |
|                 | Reverse | CTAAGGGTAAATCAGGGATAGGG |
| <i>CDK6</i>     | Forward | GCACATCAGTAATTCAGTAGAC  |
|                 | Reverse | ATAGCCAGGAGAGTAATTCATC  |
| <i>MDM2</i>     | Forward | GCTCATCCTTTACACCAACTCC  |
|                 | Reverse | TACCTCCCTTATAGACCATTACG |

Table S2.

|                       |                                            |                                                                      |
|-----------------------|--------------------------------------------|----------------------------------------------------------------------|
| hsa-miR-129-5p        | RT primer                                  | CCAGGTATGCAGAGCAGGGTCCGAGGTATCCAT<br>CGCACGCATCGCACTGCATACCTGGGCAAGC |
|                       | Forward primer                             | AGCTTTTTGCGGTCTGG                                                    |
| <i>SNORD47</i>        | RT primer                                  | GTCGTATGCAGAGCAGGGTCCGAGGTATTCGCA<br>CTGCATACGACAACCTC               |
|                       | Forward primer                             | ATCACTGTAAAACCGTTCCA                                                 |
| Common Reverse primer | GAGCAGGGTCCGAGGT                           |                                                                      |
| Universal probe       | FAM 5' TCCATCGCACGCATCGCACT 3' BHQ-1-3'    |                                                                      |
| <i>SNORD47</i> probe  | FAM 5' TGATTCTGAGGTTGTCGTATGCA 3' BHQ-1-3' |                                                                      |

Table S3.

| Real-time PCR primers |         |                                 |
|-----------------------|---------|---------------------------------|
| <i>β2m</i>            | Forward | ATG CCT GCC GTG TGA AC          |
|                       | Reverse | ATC TTC AAA CCT CCA TGA TG      |
| <i>CDK4</i>           | Forward | GCT GCT GGA AAT GCT GAC         |
|                       | Reverse | CAC TCC ATT GCT CAC TCC         |
| <i>CDK6</i>           | Forward | GCG ACT TGA AGA ACG GAG         |
|                       | Reverse | ATC AAA CAA CCT GAC CAC G       |
| <i>MDM2</i>           | Forward | TGT AAC CAC CTC ACA GAT TCC     |
|                       | Reverse | GCA CCA ACA GAC TTT AAT AAC TTC |
